# Supplementary material for: Hydrogen bonded co-assembly of aromatic amino acids and bipyridines that serves as a sacrificial template in superstructure formation
Source: Royal Society of Chemistry journal article supplement (doi:10.1039/c9sm01271k), 2019-01-01
Supplement: c9sm01271k1.pdf [file c9sm01271k1.pdf]

## ESI

# Hydrogen Bonded Coassembly of Aromatic Amino Acids and Bipyridines that Serves as Sacrificial Templates in Superstructure Formation

Zhuoer Wang,<sup>a</sup> Qihong Cheng,<sup>a</sup> Pengyao Xing<sup>a</sup>, Zhaozhen Cao<sup>\*a</sup> and Aiyu Hao<sup>\*b</sup>

<sup>a</sup>Key Laboratory of Colloid and Interface Chemistry of Ministry of Education and School of Chemistry and Chemical Engineering, Shandong University, Jinan 250100, People's Republic of China

<sup>b</sup>Institute of Organic Chemistry, School of Chemistry and Chemical Engineering, Shandong University, Jinan 250100, People's Republic of China

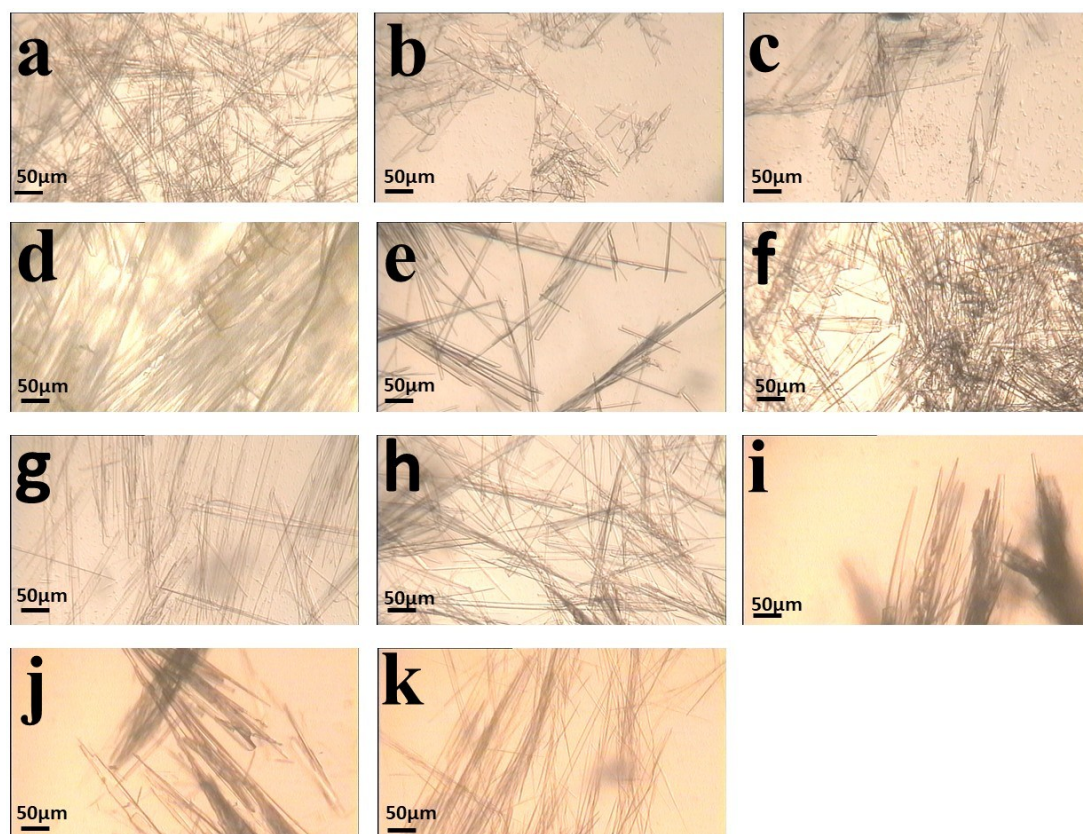

**Figure S1.** Optical microscopy images. a) Asp-BPE coassembly in MeOH ( $C_{\text{Asp}} =$

66.7mM). b) Gly-BP coassembly in acetone ( $C_{\text{Gly}} = 100 \text{ mM}$ ). c) Gly-BPE coassembly in acetone ( $C_{\text{Gly}} = 100 \text{ mM}$ ). d) Ala-bpe coassembly in acetone ( $C_{\text{Ala}} = 100 \text{ mM}$ ). e) Asp-BPE coassembly in acetone ( $C_{\text{Asp}} = 100 \text{ mM}$ ). f) Gly-BP coassembly in EtOH ( $C_{\text{Gly}} = 66.7 \text{ mM}$ ). g) Gly-BPE coassembly in EtOH ( $C_{\text{Gly}} = 66.7 \text{ mM}$ ). h) Asp-BPE coassembly in EtOH ( $C_{\text{Asp}} = 66.7 \text{ mM}$ ). i) Gly-BPE coassembly in MeCN ( $C_{\text{Gly}} = 15 \text{ mM}$ ). j) Asp-BPE coassembly in MeCN ( $C_{\text{Asp}} = 66.7 \text{ mM}$ ). k) Gly-BPE coassembly in THF ( $C_{\text{Gly}} = 66.7 \text{ mM}$ ). Molar ratio between aromatic amino acids and bipyridine was fixed at 2:1.

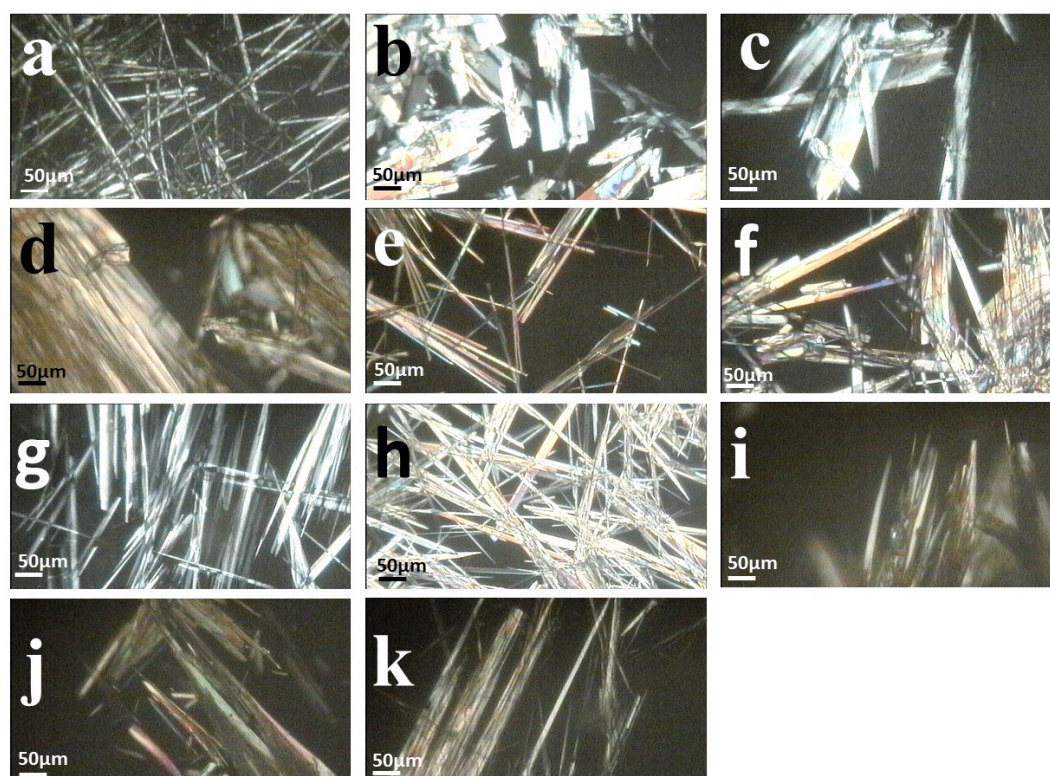

**Figure S2.** Polarized optical microscopic images. a) Asp-BPE coassembly in MeOH ( $C_{\text{Asp}} = 66.7\text{mM}$ ). b) Gly-BP coassembly in acetone ( $C_{\text{Gly}} = 100 \text{ mM}$ ). c) Gly-BPE coassembly in acetone ( $C_{\text{Gly}} = 100 \text{ mM}$ ). d) Ala-bpe coassembly in acetone ( $C_{\text{Ala}} = 100 \text{ mM}$ ). e) Asp-BPE coassembly in acetone ( $C_{\text{Asp}} = 100 \text{ mM}$ ). f) Gly-BP coassembly in EtOH ( $C_{\text{Gly}} = 66.7 \text{ mM}$ ). g) Gly-BPE coassembly in EtOH ( $C_{\text{Gly}} = 66.7 \text{ mM}$ ). h) Asp-BPE coassembly in EtOH ( $C_{\text{Asp}} = 66.7 \text{ mM}$ ). i) Gly-BPE coassembly in MeCN ( $C_{\text{Gly}} = 15 \text{ mM}$ ). j) Asp-BPE coassembly in MeCN ( $C_{\text{Asp}} = 66.7 \text{ mM}$ ). k) Gly-BPE coassembly in THF ( $C_{\text{Gly}} = 66.7 \text{ mM}$ ). Molar ratio between aromatic amino



acids and bipyridine was fixed at 2:1.

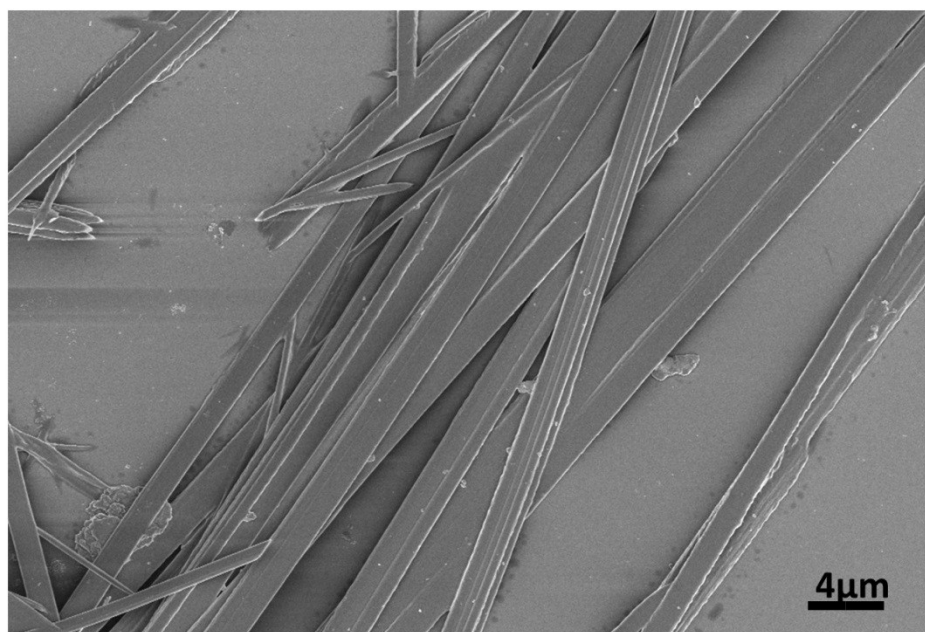

**Figure S3.** SEM image of Asp-BPE coassembly in MeOH (66.7mM:33.3mM).

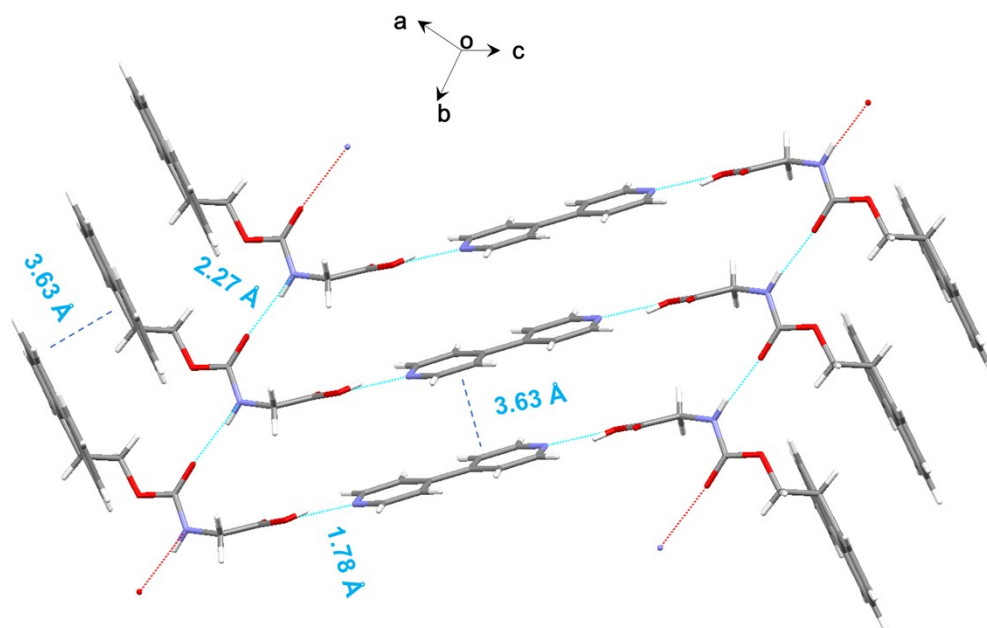

**Figure S4.** Stacking of Gly-BP in crystal structure.

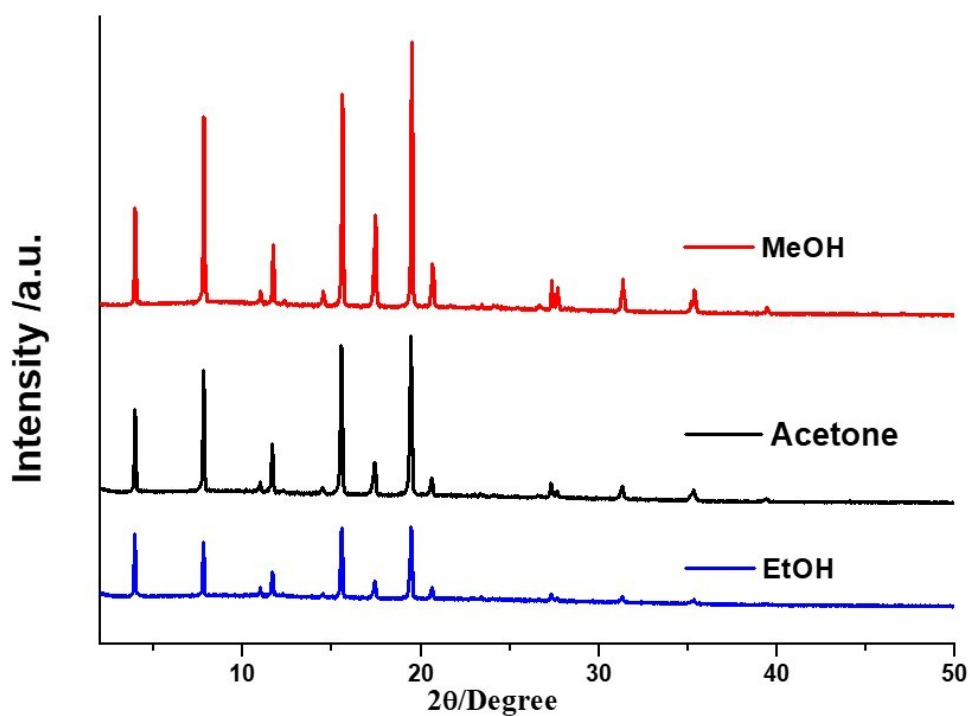

**Figure S5.** XRD pattern comparison of Gly-BP in MeOH ( $C_{\text{Gly}} = 66.7\text{mM}$ ), acetone ( $C_{\text{Gly}} = 200\text{ mM}$ ), EtOH ( $C_{\text{Gly}} = 66.7\text{mM}$ ). Molar ratio between aromatic amino acids and bipyridine was fixed at 2:1.

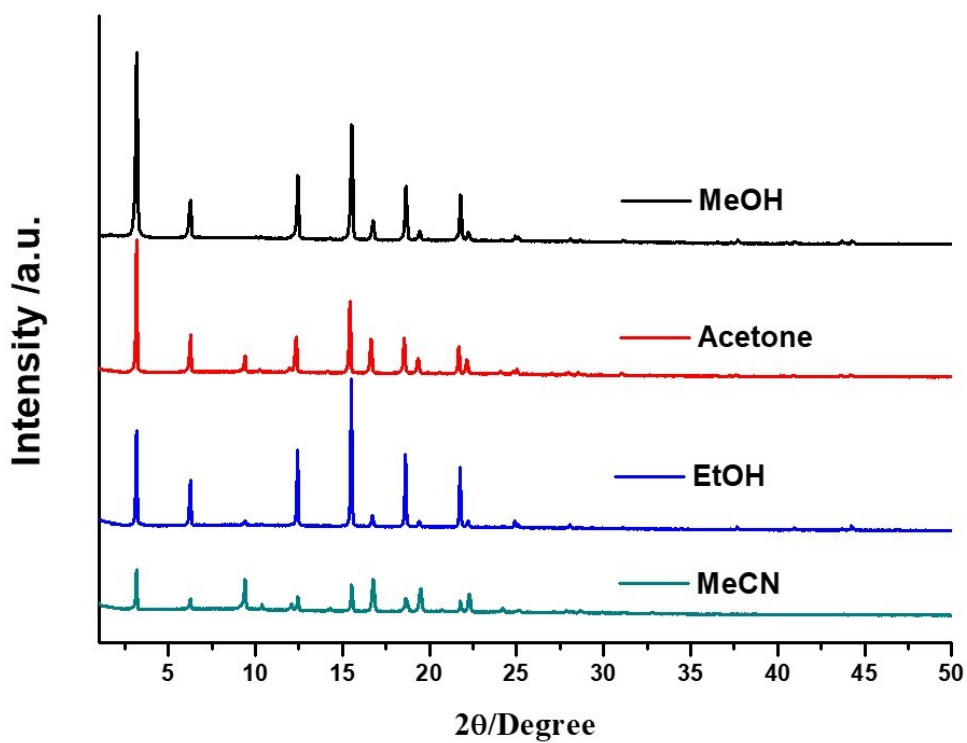

**Figure S6.** XRD patterns of Asp-BPE coassemblies in MeOH ( $C_{\text{Asp}} = 66.7\text{ mM}$ ),

acetone ( $C_{\text{Asp}} = 100 \text{ mM}$ ), EtOH ( $C_{\text{Asp}} = 66.7 \text{ mM}$ ) and MeCN ( $C_{\text{Asp}} = 66.7 \text{ mM}$ ).  
Molar ratio between aromatic amino acids and bipyridine was fixed at 2:1.

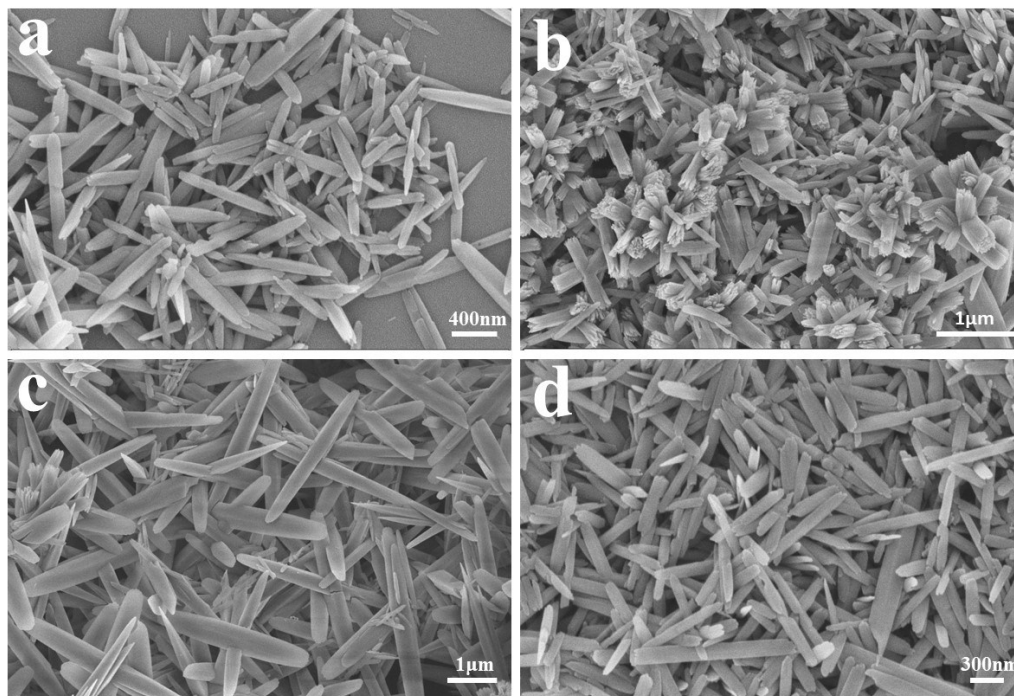

**Figure S7.** SEM images of Co-BP coassembly (50mM:50mM) in methanol.

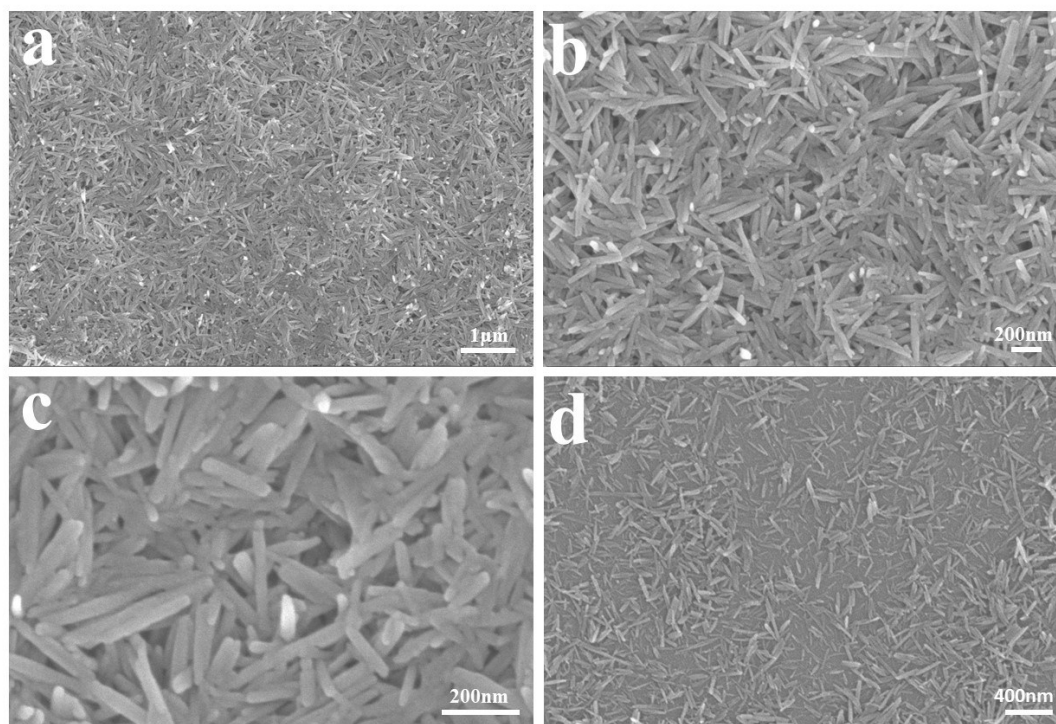

**Figure S8.** SEM images of Ni-BP coassembly (50mM:50mM) in methanol.

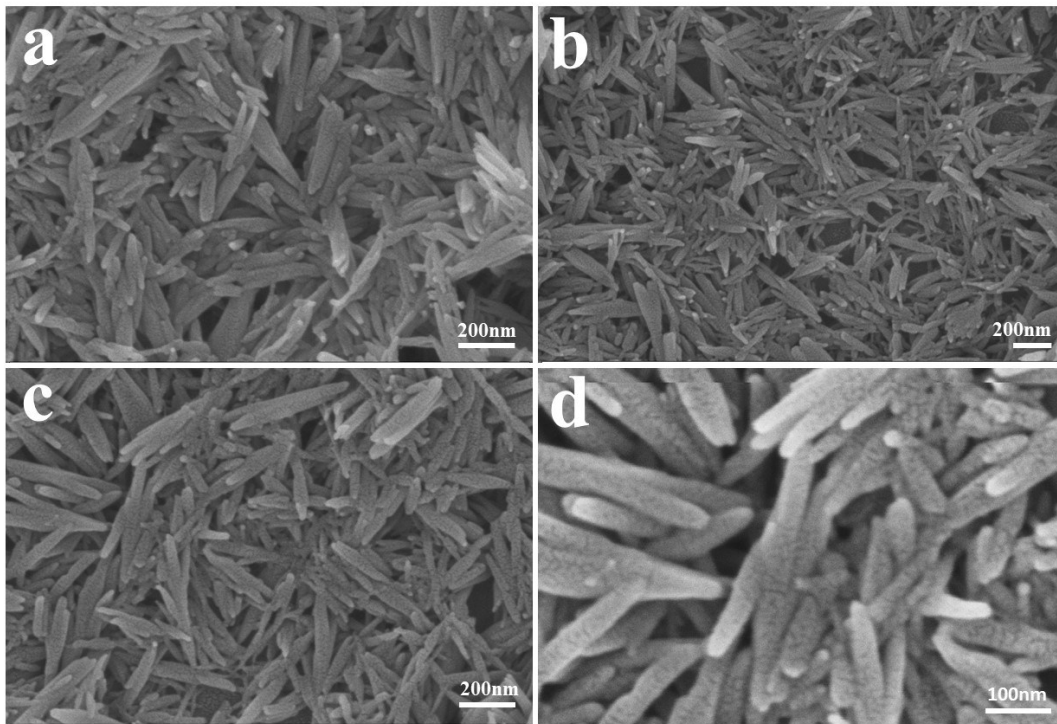

**Figure S9.** SEM images of Cu-BP coassembly (50mM:50mM) in methanol.

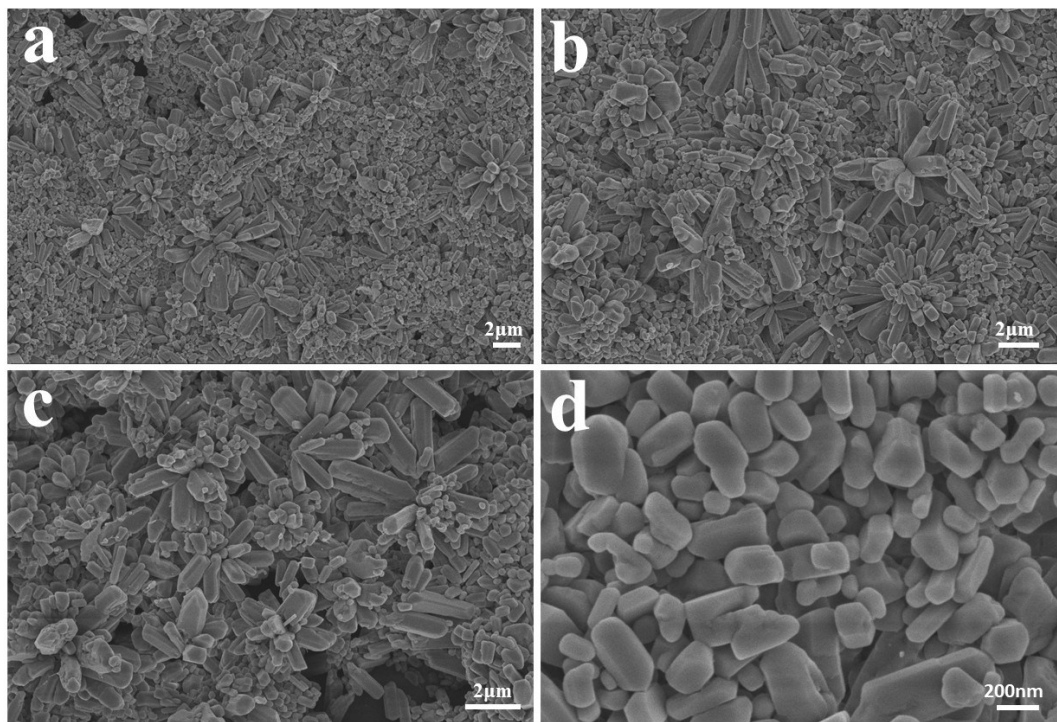

**Figure S10.** SEM images of Zn-BP coassembly (50mM:50mM) in methanol.



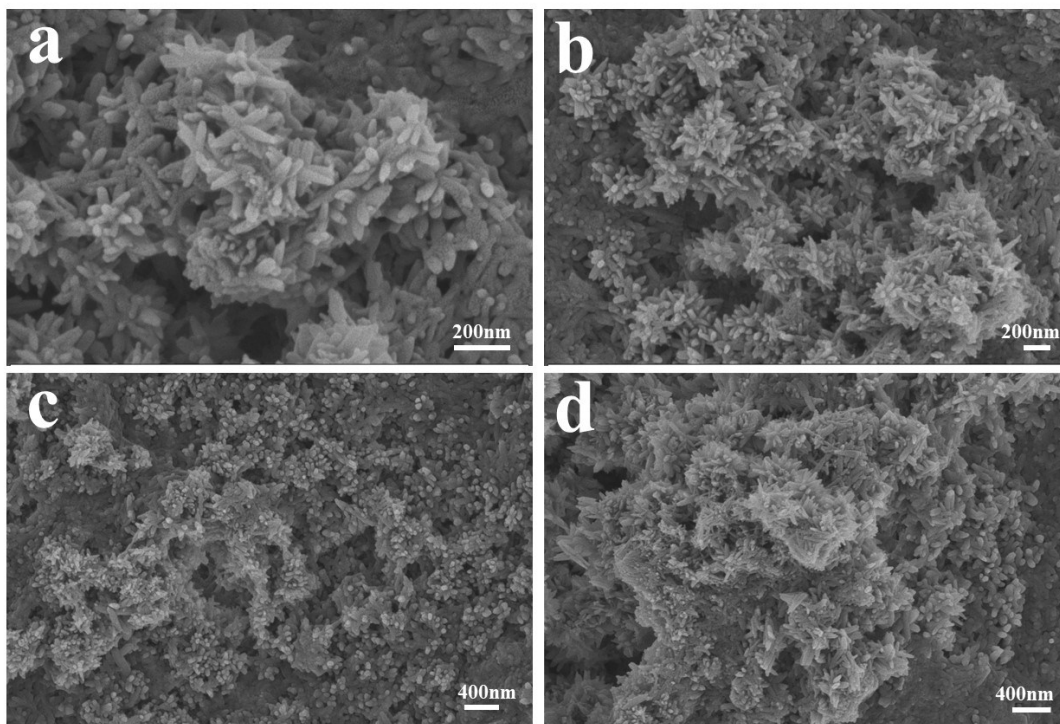

**Figure S11.** SEM images of Ni-BPE coassembly (50mM:50mM) in methanol.

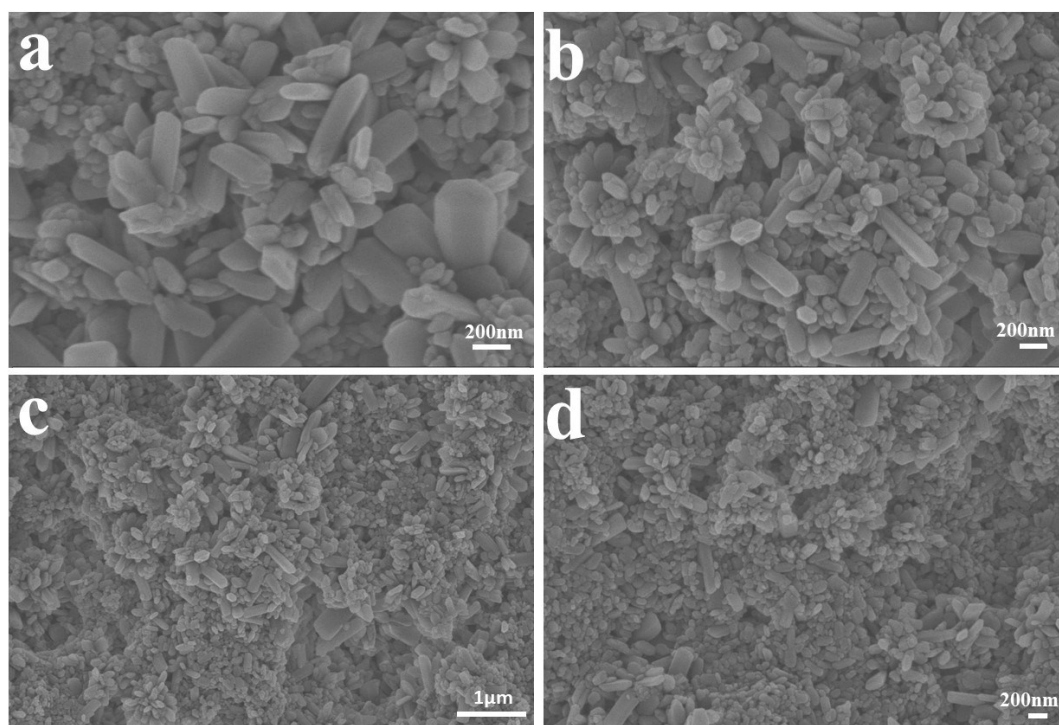

**Figure S12.** SEM images of Zn-BPE coassembly (50mM:50mM) in methanol.

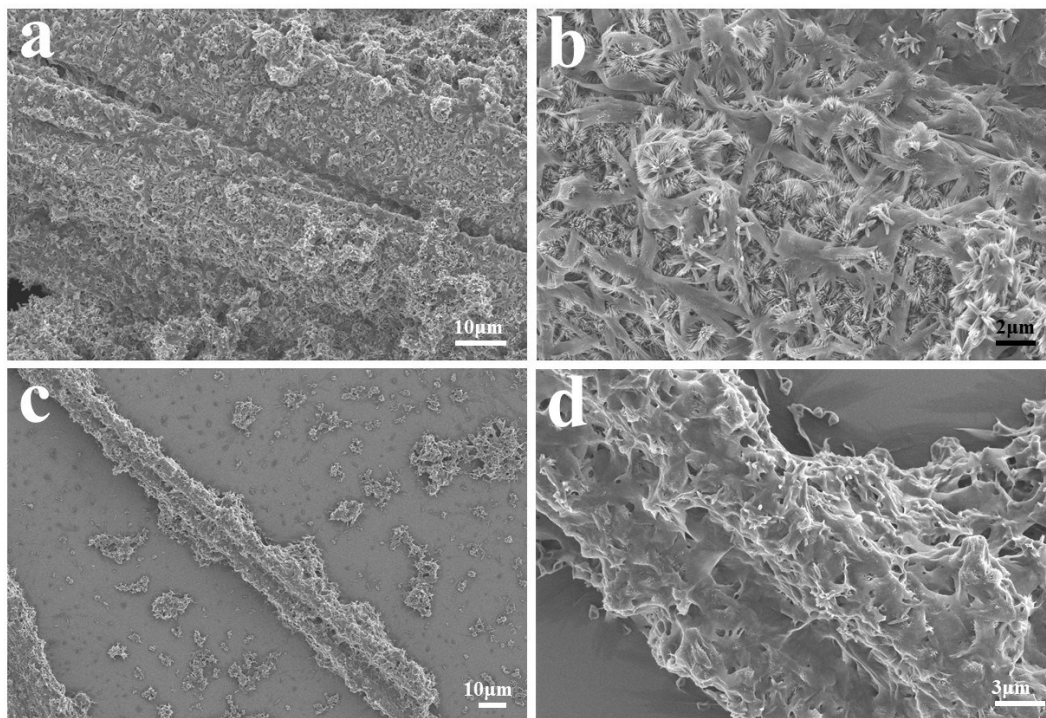

**Figure S13.** SEM image of Ni(II) treated Gly-BP (66.7 mM:33.3 mM) coassemblies ( $C_{Ni} = 25$  mM).



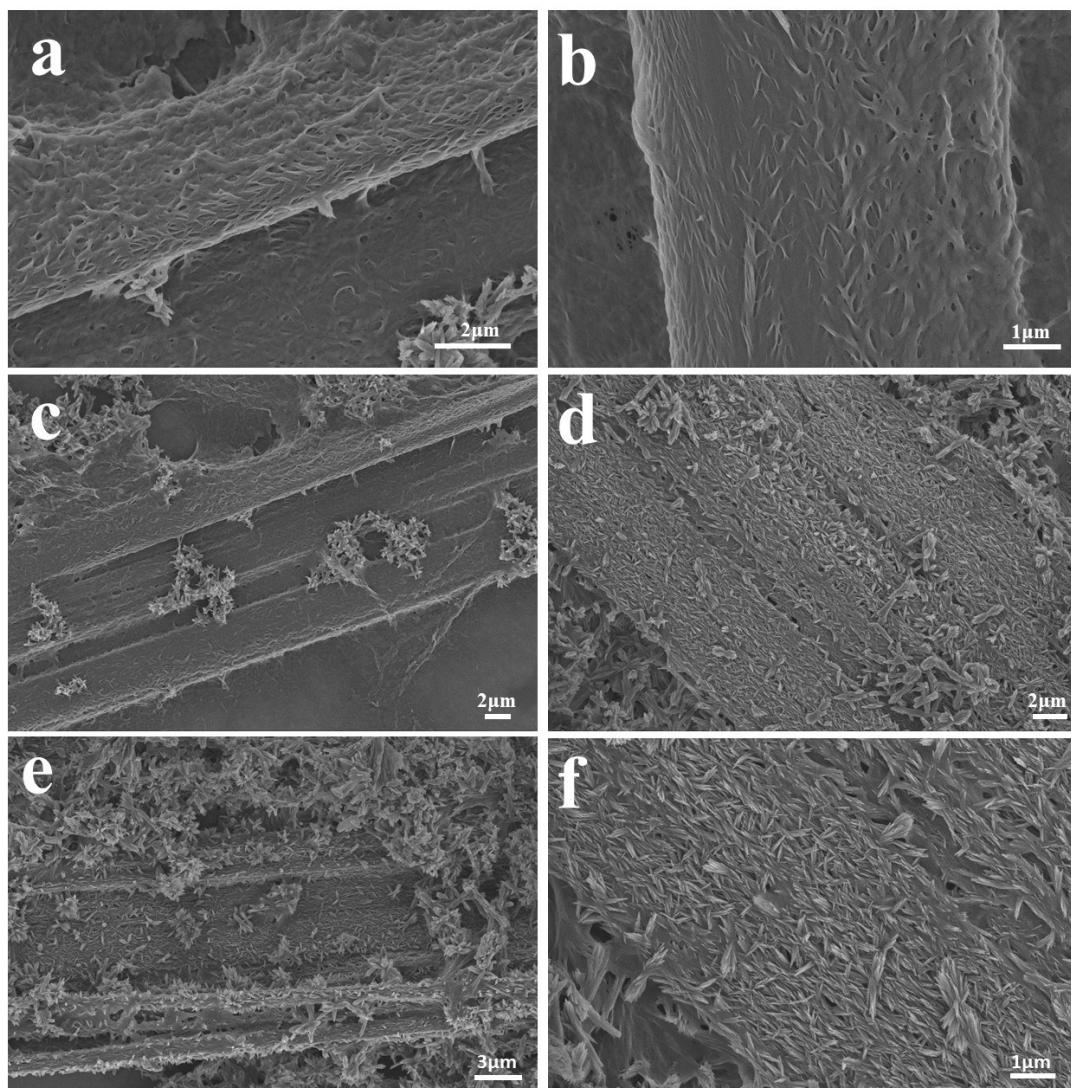

**Figure S14.** SEM image of Ni(II) treated Gly-BPE (66.7 mM:33.3 mM) coassemblies ( $C_{\text{Ni}} = 11.8 \text{ mM}$  for a-c;  $C_{\text{Ni}} = 6.25 \text{ mM}$  for d-f).

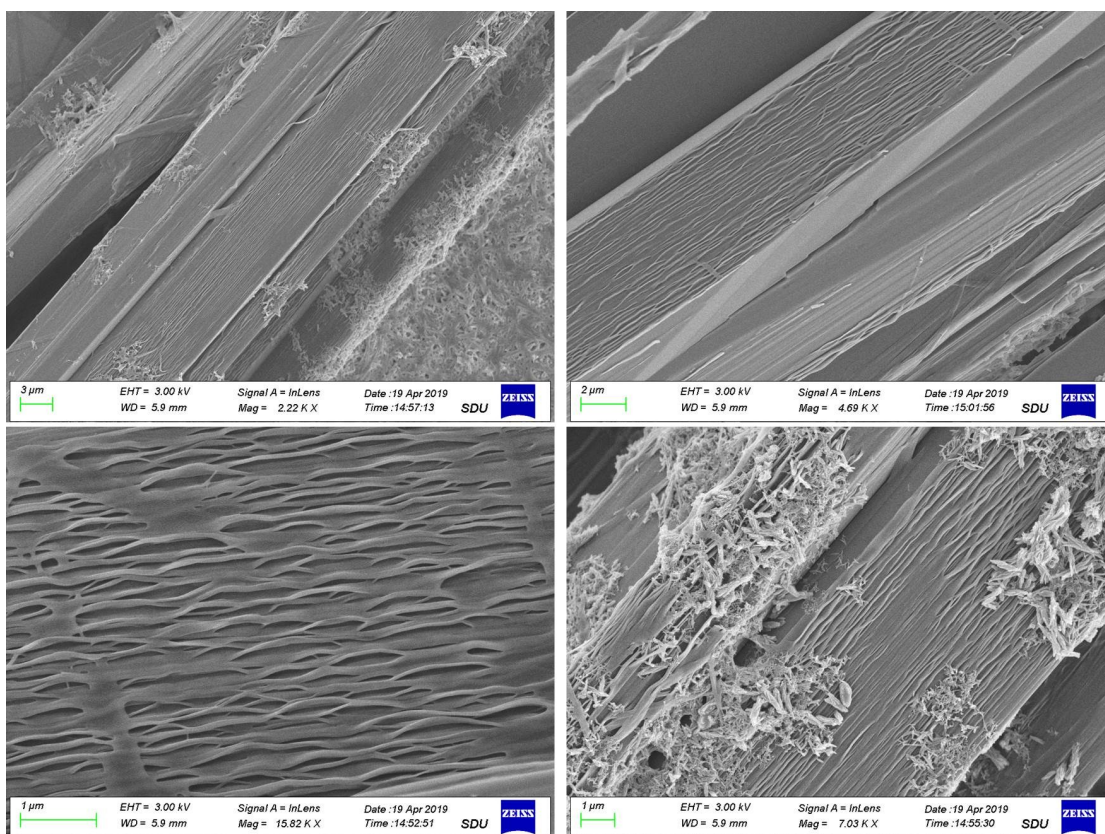

**Figure S15.** SEM image of Cu(II) treated Gly-BP (66.7 mM:33.3 mM) coassemblies ( $C_{\text{Ni}} = 11.8 \text{ mM}$ ).

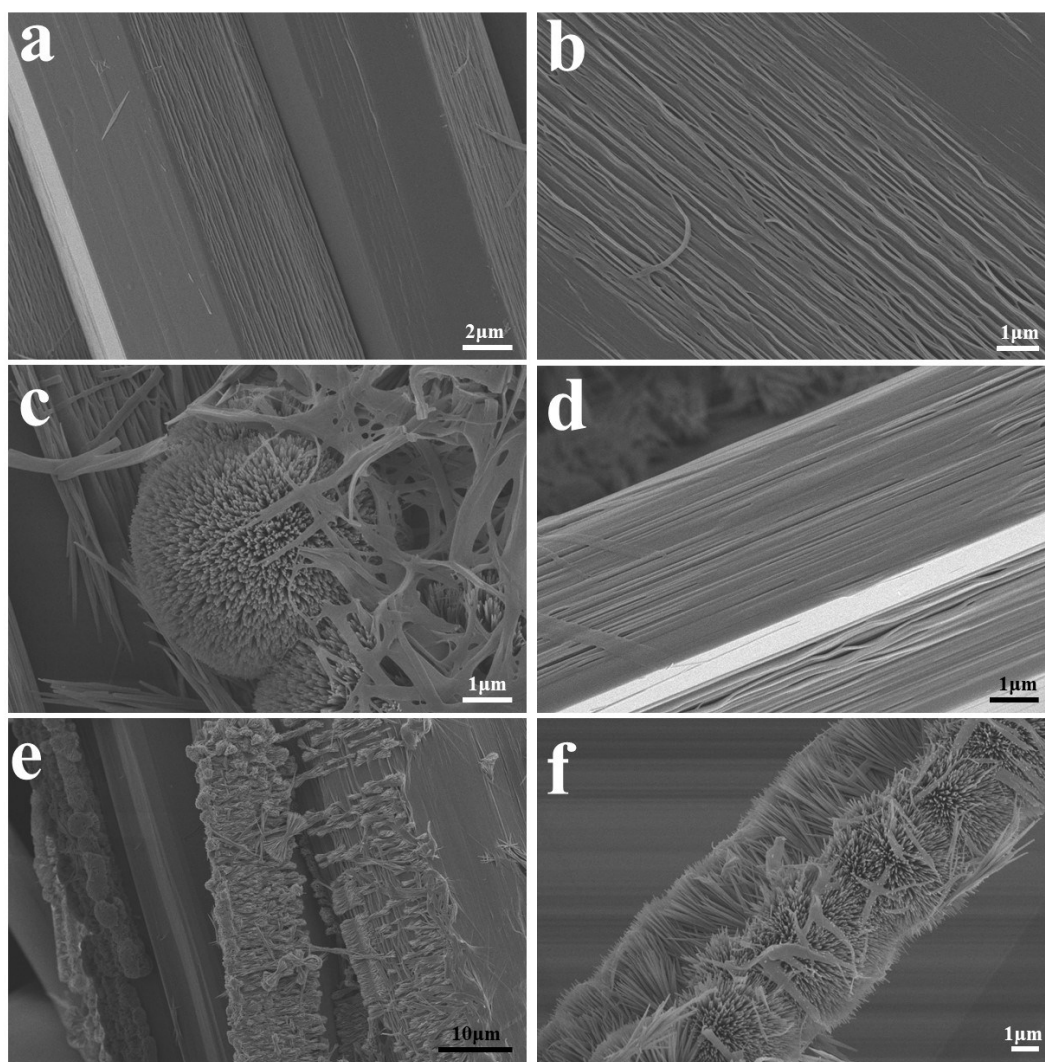

**Figure S16.** SEM image of Co(II) treated Gly-BP (66.7 mM:33.3 mM) coassemblies ( $C_{Co} = 11.8$  mM for a-c;  $C_{Co} = 9.1$  mM for d-f).

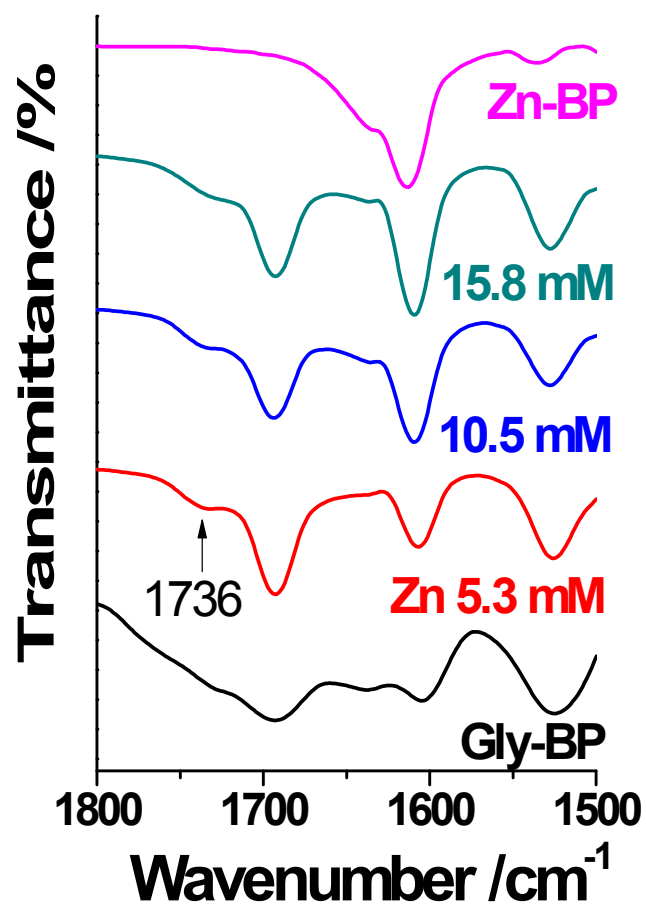

**Figure S17.** FT-IR spectra of Zn-treated Gly-BP samples with different Zn<sup>2+</sup> concentrations. (Zn-BP 50 mM:50 mM; Gly-BP 66.7 mM:33.3 mM)
